**TITLE:**

“I prefer a doctor on camera than none at all”: Participants’ Perspectives on the Implementation of Integrated Telehealth and Community Health Workers Services to Improve Access to Healthcare in Rural Communities

**Authors:**

Jose G. Perez-Ramos PhD, MPH  
Assistant Professor  
University of Rochester Medical Center  
Department of Public Health Sciences  
j.perezramos@rochester.edu

Scott McIntosh PhD  
Professor  
University of Rochester Medical Center  
Department of Public Health Sciences  
Scott\_McIntosh@URMC.Rochester.edu

Joselyn Wei-Chen  
Research Assistant  
University of Rochester, School of Medicine and Dentistry  
Department of Public Health Sciences  
jweichen@u.rochester.edu

Jessica Alicea-Vellon

1  
2  
3 27 Community Health Worker

4  
5 28 HealthproMED Inc.

6  
7 29 [jesalicea@healthpromed.org](mailto:jesalicea@healthpromed.org)

8  
9 30

10  
11 31 Carlos Rodriguez-Diaz PhD, MPH, MCHES

12  
13 32 Professor and Chair Department of Community Health Sciences

14  
15 33 Boston University School of Public Health

16  
17 34 [carod@bu.edu](mailto:carod@bu.edu)

18  
19 35

20  
21  
22 36 **CRedit Taxonomy**

23  
24 37

25  
26 38 **Contributor Roles**

27  
28 39 Conceptualization: José G. Pérez-Ramos, Scott McIntosh, Joselyn Wei-Chen

29  
30 40 Data curation: José G. Pérez-Ramos, Joselyn Wei-Chen, Jessica Alicea-Vellon

31  
32 41 Formal analysis: José G. Pérez-Ramos, Joselyn Wei-Chen

33  
34 42 Funding acquisition: José G. Pérez-Ramos

35  
36 43 Investigation: José G. Pérez-Ramos, Jessica Alicea-Vellon

37  
38 44 Methodology: José G. Pérez-Ramos, Scott McIntosh, Joselyn Wei-Chen

39  
40 45 Project administration: José G. Pérez-Ramos, Jessica Alicea-Vellon, Joselyn Wei-Chen

41  
42 46 Resources: José G. Pérez-Ramos, Jessica Alicea-Vellon

43  
44 47 Software: José G. Pérez-Ramos, Joselyn Wei-Chen, Jessica Alicea-Vellon

45  
46 48 Supervision: José G. Pérez-Ramos, Scott McIntosh

47  
48 49 Validation: José G. Pérez-Ramos, Scott McIntosh

49  
50 50 Visualization: José G. Pérez-Ramos, Joselyn Wei-Chen

51  
52 51 Writing original draft: José G. Pérez-Ramos, Joselyn Wei-Chen, Scott McIntosh, Carlos Rodriguez-Diaz

It is made available under a [CC-BY-NC-ND 4.0 International license](https://creativecommons.org/licenses/by-nc-nd/4.0/) .

1  
2  
3  
4  
5  
6  
7  
8  
9  
10  
11  
12  
13  
14  
15  
16  
17  
18  
19  
20  
21  
22  
23  
24  
25  
26  
27  
28  
29  
30  
31  
32  
33  
34  
35  
36  
37  
38  
39  
40  
41  
42  
43  
44  
45  
46  
47  
48  
49  
50  
51  
52  
53  
54  
55  
56  
57  
58  
59  
60

52 Writing review & editing: José G. Pérez-Ramos, Joselyn Wei-Chen, Scott McIntosh, Jessica Alicea-  
53 Vellon, Carlos Rodriguez-Diaz

For Peer Review

1  
2  
3 **78 ABSTRACT**

4  
5 **79 Background**

6  
7 **80** Rural and isolated communities, such as Culebra, Puerto Rico, face significant healthcare challenges due  
8  
9 **81** to geographic isolation, limited medical resources, and socioeconomic disadvantages. Chronic diseases,  
10  
11 **82** particularly diabetes and hypertension, are prevalent and contribute to poor health outcomes. Telehealth  
12  
13 **83** services (THS) and community health workers (CHWs) have been identified as effective interventions for  
14  
15 **84** improving healthcare access in underserved areas. This study aimed to explore the community  
16  
17 **85** perceptions and attitudes towards integrating THS with the support of CHWs to enhance chronic disease  
18  
19 **86** management in Culebra.

20  
21  
22 **87 Methods**

23  
24 **88** A Qualitative Research approach involved 20 patients from Culebra's Federally Qualified Health Center  
25  
26 **89** (FQHC). Semi-structured interviews were conducted, guided by the Socio-Ecological Model (SEM), to  
27  
28 **90** assess community perspectives toward THS and CHWs at individual, interpersonal, community, and  
29  
30 **91** societal levels. Thematic analysis revealed three primary themes: social determinants of health, the role of  
31  
32 **92** CHWs, and the benefits and challenges of THS.

33  
34  
35 **93 Results**

36  
37 **94** Findings indicate that CHWs play a critical role in improving healthcare access by assisting with medical  
38  
39 **95** appointments, medication management, and providing emotional support. THS was recognized for its  
40  
41 **96** potential to reduce transportation barriers and improve continuity of care, though concerns regarding  
42  
43 **97** convenience, technology access, and data privacy persist. The integration of CHWs and THS was viewed  
44  
45 **98** positively as a solution to healthcare access challenges, with participants expressing trust in this model for  
46  
47 **99** managing chronic diseases.

48  
49  
50 **100 Discussion**

51  
52 **101** This study highlights the need for further development of THS infrastructure and CHW support to ensure  
53  
54 **102** equitable healthcare access in rural areas like Culebra. The combination of THS and CHWs shows  
55  
56 **103** promise for reducing healthcare disparities and improving outcomes for isolated populations. Future

It is made available under a [CC-BY-NC-ND 4.0 International license](https://creativecommons.org/licenses/by-nc-nd/4.0/) .

1  
2  
3 104 efforts should focus on systemic changes to address broader social determinants of health, fostering  
4  
5 105 sustainable and effective healthcare delivery in underserved communities.  
6

7 106

9 107

11 108

13 109

15 110

17 111

19 112

21 113

23 114

25 115

27 116

29 117

31 118

33 119

35 120

37 121

39 122

41 123

43 124

45 125

47 126

49 127

51 128

53 129

55

57

59

For Peer Review

1  
2  
3 **130 BACKGROUND**

4  
5 **131** In the United States (US), one in five communities represents a rural or isolated area.(1) Rural and  
6  
7 **132** isolated communities face numerous healthcare challenges, typically as consequences of having limited  
8  
9 **133** access to healthcare due to their lower socioeconomic status and geographic location relative the  
10  
11 **134** services.(2, 3) The health outcomes of people living in rural communities, such as survival rate,  
12  
13 **135** complication frequency, and disease management, are often worse compared to people living in urban  
14  
15 **136** areas, resulting in a significant public health crisis.(4) The same factors impact the health and healthcare  
16  
17 **137** of persons in Latinx communities, including a higher prevalence of chronic conditions such as diabetes  
18  
19 **138** (10.3% in Hispanic communities compared to 8.5% in non-Hispanic white communities) among adults  
20  
21 **139** aged 18 years or older.(5) These disparities are even more pronounced for people living in Puerto Rico,  
22  
23 **140** who experience the worst health outcomes compared to the general US population, having an estimated  
24  
25 **141** diabetes prevalence of 20.1% among adults.(6) Puerto Rico (PR) is a territory of the US that includes  
26  
27 **142** many rural communities that experience further isolation by an amalgam of factors. Chronic diseases,  
28  
29 **143** such as diabetes and hypertension, represent pressing public health problems in many rural and isolated  
30  
31 **144** communities in PR. According to The Centers for Disease Control and Prevention (CDC), chronic  
32  
33 **145** diseases are the leading cause of death among adults in the US and PR.(7) Compared to other jurisdictions  
34  
35 **146** in the US, previous studies had suggested a higher prevalence of chronic diseases among people in PR;  
36  
37 **147** hypertension (39% vs 36%) and high cholesterol (16% vs 10%).(8)  
38  
39 **148** Most people in PR (98.9%) self-identify as Latinx/Hispanic in official federal documents. PR is an  
40  
41 **149** archipelago with three inhabited islands; most people live in the “big island” of Puerto Rico, and the two  
42  
43 **150** populated island municipalities are Culebra and Vieques. Culebra is the smallest of the inhabited islands,  
44  
45 **151** located 17 miles east of the island of PR with an extension of 11.62 mi<sup>2</sup>. The island of Culebra is the least  
46  
47 **152** populous municipality of PR, with a population of 1,792. Among its residents, the median age is 44.6  
48  
49 **153** years, 23.5% live under the poverty level, 56.7% are unemployed, and 13.5% don’t have healthcare  
50  
51 **154** coverage.(9) The estimated prevalence of diabetes and hypertension were 15.1% and 39.2%, respectively,  
52  
53 **155** in Culebra (2019).(10) The people of Culebra have historically faced numerous challenges accessing  
54  
55  
56  
57  
58  
59  
60

1  
2  
3 156 healthcare services.(11) Geographic isolation, scarce medical resources, and a shortage of healthcare  
4  
5 157 providers all affect the consistent medical care, particularly for those with chronic diseases. They rely on  
6  
7 158 the health services on the main island, already strained by the lack of enough providers due to migration,  
8  
9 159 causing long waiting times for service.(12) The lack of reliable transportation to the main island  
10  
11 160 exacerbates these barriers to access to care. (13-15) These challenges are social determinants of health  
12  
13 161 (SDoH) that result in significant health inequities affecting the lives of island residents.  
14  
15 162 Healthcare responses to the COVID-19 pandemic have demonstrated that Telehealth services (THS) and  
16  
17 163 the deployment of community health workers (CHWs) increase access to care and improve health  
18  
19 164 outcomes, particularly in rural areas that were previously underserved.(16) However, THS has not been  
20  
21 165 equitably available, and rural communities such as those in PR have yet to benefit from this opportunity  
22  
23 166 for increased access.(17) The healthcare disparities and challenges associated with chronic disease  
24  
25 167 management faced by Culebra or similar communities have not been fully addressed, particularly with the  
26  
27 168 integration of CHWs and THS in improving the health outcomes of rural and isolated communities.  
28  
29 169 Considering the opportunity to provide evidence-based services to improve access to care services for  
30  
31 170 Latinx populations in isolated communities, this study aimed to explore the community perceptions and  
32  
33 171 attitudes toward integrating THS with the support of CHWs to improve healthcare access for people with  
34  
35 172 chronic diseases in isolated areas such as the island of Culebra, PR.  
36  
37  
38  
39  
40

## 41 174 **METHODS**

### 42 175 **Research Team**

43  
44 176 This research was implemented by an established Community-Academic Partnership (CAP) between a  
45  
46 177 research academic institution and HealthproMed Inc., the only Federally Qualified Health Center (FQHC)  
47  
48 178 in Culebra. The CAP identified the need to understand how the community perceived the potential  
49  
50 179 implementation of two evidence-based interventions (EBI): 1) CHWs assisted 2) THS for patients with a  
51  
52 180 specialist referral to manage their chronic disease (e.g., diabetes and hypertension). The research team  
53  
54 181 integrated the Socio-Ecological Model (SEM) as a theoretical framework to explore how the community  
55  
56  
57  
58  
59  
60

1  
2  
3 182 perspectives were related within and across different and multiple levels. With this approach, findings  
4  
5 183 would support the comprehensive implementation of these integrated interventions.(18)  
6  
7 184 The research team comprised a multidisciplinary group of professionals, including a trained and certified  
8  
9 185 community health worker in Culebra, FQHC personnel, including a nurse and health specialist provider,  
10  
11 186 and the study team located in Rochester, NY. The team’s collective efforts aim to create a culturally  
12  
13 187 congruent, ethically sound research environment that contributes to the academic field and brings tangible  
14  
15 188 improvements to healthcare access and better management of individuals in isolated island communities  
16  
17 189 like Culebra. This study was approved by the URMCI Institutional Review Board #STUDY00007257 and  
18  
19 190 followed COREQ guidelines to report qualitative research.(19)  
20  
21

22 191

## 23 24 192 **Study Design**

25  
26 193 This study focused on ascertaining community perceptions toward THS infrastructures and the role of  
27  
28 194 CHWs in addressing health access for people with chronic diseases. For this qualitative study, we  
29  
30 195 recruited 20 community patients from the local FQHC in Culebra, using a purposive sampling  
31  
32 196 methodology and direct recruitment efforts from CHWs. A total of 20 participants were recruited, which  
33  
34 197 was considered sufficient to provide adequate information power. Information Power approach facilitates  
35  
36 198 the justification for this smaller sample size by having the study with a specific aim, a focused sample,  
37  
38 199 and strong interactions between participants and researchers.(20) Participants were required to be older, at  
39  
40 200 least 18 years old, live in Culebra, have a chronic disease diagnosis, and be able to read the information  
41  
42 201 provided in Spanish for informed consent. The exclusion criteria included non-residents, non-patients of  
43  
44 202 the local FQHC, and unable to communicate in Spanish. The study was conducted in Spanish because it is  
45  
46 203 the official language in PR and the primary language of most of Culebra’s residents.  
47  
48

49 204

50  
51 205 An interview guide for semi-structured qualitative interviews was developed and conducted by a team  
52  
53 206 member proficient in qualitative research methodologies and fluent in Spanish.(21) The interview guide  
54  
55 207 was developed using the SEM framework to capture in-depth perceptions of THS and the role of CHWs  
56  
57  
58  
59  
60



1  
2  
3 208 in the community as an intervention to increase access to healthcare. Our research team member  
4  
5 209 experienced in qualitative research methodology conducted all interviews in Spanish. The Rapid  
6  
7 210 Qualitative Inquiry (RQI) method allowed for a dynamic and iterative data collection and analysis  
8  
9 211 process, which supported the identification of salient themes and patterns.(22) Participants were recruited  
10  
11 212 from the clinic's patient population and were informed of their rights to discontinue participation or skip  
12  
13 213 questions at any point. The interviews lasted up to an hour and were conducted in familiar community  
14  
15 214 settings, such as the facilities of the FQHC and community centers, ensuring a comfortable and private  
16  
17 215 environment for participants to share their experiences. Thematic analysis was conducted and supported  
18  
19 216 the identification of salient topics shared by participants.(23) Themes and supportive quotes were  
20  
21 217 translated and back-translated from Spanish to English by two Spanish-speaking speakers members of the  
22  
23 218 research team following the Brislin Back-Translation Method to address interval validity.(24)  
24  
25  
26 219  
27  
28 220 Participants were compensated with \$10.00 cash at the end of the interviews. Additionally, they were  
29  
30 221 offered refreshments in a culturally congruent manner to express gratitude for their participation. The  
31  
32 222 study design prioritized participant privacy and data protection. Data were collected anonymously, and  
33  
34 223 participants were encouraged not to disclose identifiable information during the interviews. However, any  
35  
36 224 identifiable information to participants was removed from transcripts and data analysis. Risks were  
37  
38 225 minimized by de-identifying all data in the final analysis, thus preserving participant confidentiality.  
39  
40 226 Interview audio files were initially stored on encrypted phones, transferred to encrypted computers, and  
41  
42 227 uploaded into a cloud-based HIPAA-compliant software with 256-bit encryption and SSL-EV to ensure  
43  
44 228 the highest level of data protection.  
45  
46 229 Table 1 presents the demographic profile of the 20 participants, who predominantly self-identified as  
47  
48 230 female (n=12; 60%) and with a diverse age range (20-70 years old). Most participants shared their age,  
49  
50 231 including from their 20s to their 70s. However, (n=8; 40%) of the participants declined to disclose their  
51  
52 232 age. The average interview duration was 55 minutes and 42 seconds. Participants' educational levels  
53  
54 233 varied, with a slight majority having completed or exceeded high school (n=11; 55%) and a quarter  
55  
56  
57  
58  
59  
60

234 having less than a high school education. Interviews were conducted between October 2022 and March  
235 2023.

236

### 237 **Data Preparation and Analysis**

238 Qualitative data analysis was conducted using Dedoose®, a qualitative analysis software that allows for  
239 direct coding.(25) Interview data were examined iteratively using thematic analysis for patterns and  
240 themes, investigating community attitudes and perceptions toward THS systems and the community  
241 health worker’s model.(23) The analysis was guided by the SEM,(18) which provided a comprehensive  
242 understanding of participants' attitudes and perceptions toward our integrated model. The team regularly  
243 ( $\geq 5$  times per week) debriefed about findings during fieldwork with partners and community members.

244

## 245 **RESULTS**

246 Identified themes and subthemes were categorized across SEM domains to provide a comprehensive  
247 understanding of the factors influencing participants’ perceptions of implementing integrated, evidence-  
248 based interventions. As shown in Figure 1, the SEM domains include Individual, Interpersonal,  
249 Community, and Societal levels, each addressing three main themes with subthemes: social determinants  
250 of health, the role of CHWs, and the impact of THS services.(18) This categorization helped illustrate  
251 how these factors interact and contribute to the understanding of the community's perspectives and  
252 attitudes toward integrating THS with the support of CHWs to improve healthcare access for people with  
253 chronic diseases on the island of Culebra. The most relevant subthemes of each theme will be discussed in  
254 the following sessions.

### 255 **Theme 1 (T1): Social Determinants of Health**

256 Participants highlighted several key issues affecting their community, including limited educational  
257 resources, economic instability, violence, and inadequate housing and transportation (Table 2). These  
258 factors create significant barriers to health and well-being, emphasizing the need for community-based

1  
2  
3 259 interventions and policies to address these underlying causes of health disparities in rural and isolated  
4  
5 260 areas.

6  
7  
8 261 **Subtheme: Transportation Problems**

9  
10  
11 262 Transportation was identified as a significant issue, with the community's geographical isolation  
12  
13 263 contributing to difficulties in accessing other areas. This affects daily life and service provision. A  
14  
15 264 participant explained, "Well, transportation. Like Vieques and Culebra, we are, as you say, far from the  
16  
17 265 big island, so sometimes we have a lot of problems with transportation, that's more than most of what it  
18  
19 266 affects" (IND49). This reflects societal-level challenges.

20  
21  
22  
23 267 **Subtheme: Environmental Health Hazards**

24  
25  
26 268 The improper management of sewage and wastewater was identified as a severe environmental and health  
27  
28 269 concern by the Culebra community. Overflows cause a threat to the cleanliness and hygiene of the  
29  
30 270 community, as expressed by one participant: "Sewage is overflowing everywhere. It is really a very  
31  
32 271 strong concern." On the other hand, participants also discussed the negative impact of exploitation-  
33  
34 272 induced destruction, particularly from investors and unsustainable practices. This leads to the destruction  
35  
36 273 of natural resources and cultural heritage and threatens the community's long-term well-being. A  
37  
38 274 participant stated, "Our natural resources are being destroyed. The new generations are the ones who are  
39  
40 275 going to have to deal with the exploitation" (IND2). Both issues affect the community and societal levels.

41  
42  
43  
44 276 **Subtheme: Lack of Medications**

45  
46  
47 277 A consistent medication shortage was identified as a pressing health issue, particularly affecting  
48  
49 278 emergency services and controlled medications. This hinders the effective management of health  
50  
51 279 conditions. One participant highlighted, "There is a lot of lack of medication. In the emergency area, there  
52  
53 280 is a lot of medication shortage" (IND2). This issue impacts individual, community, and societal levels.

1  
2  
3 **281 Subtheme: Lack of Education Resources**

4  
5  
6 **282** Participants identified a shortage in the availability and quality of educational resources, exemplified by a  
7  
8 **283** lack of schools and the underutilization of existing educational spaces. This lack of resources was seen as  
9  
10 **284** a barrier to providing adequate education within the community. For instance, one participant stated,  
11  
12 **285** "Everything that has to do with education, that is what we are looking for" (FG1). These insights reflect  
13  
14 **286** significant concerns at the individual, community, and societal levels.

15  
16  
17  
18 **287 Subtheme: Loneliness in Some Individuals**

19  
20  
21 **288** Feelings of isolation and loneliness were identified as significant concerns for specific community  
22  
23 **289** members, particularly during times of personal crisis. Loneliness affects mental and emotional well-  
24  
25 **290** being. For example, one participant noted that some patients like to come to the clinic to have company  
26  
27 **291** "because many times they are alone, and what they want is to talk" (IND2). This reflects the individual-  
28  
29 **292** level impact of social isolation.

30  
31  
32 **293 Subtheme: Employment**

33  
34  
35 **294** A lack of diverse employment opportunities was highlighted as a significant issue, especially for the  
36  
37 **295** youth. The local economy offers limited career paths, forcing individuals to migrate or accept  
38  
39 **296** employment outside their desired professions. A participant explained, "For young people, there are not  
40  
41 **297** many [options out] there; what we have are the same [jobs] in a restaurant, but there is no way that if  
42  
43 **298** someone wants to be a lawyer, there is no way. There are not many alternatives for work" (FG1). The  
44  
45 **299** decline in the available labor force, mainly due to an aging population, was seen as a challenge in  
46  
47 **300** maintaining essential services. This sense of vulnerability affects those who are aging or ill. This issue  
48  
49 **301** impacts the individual, community and societal levels.

50  
51  
52  
53 **302 Theme 2 (T2): The Role of Community Health Workers**

1  
2  
3 303 Community Health Workers are vital in enhancing healthcare access and quality for individuals in  
4  
5 304 underserved communities (Table 3). They provide essential support by assisting with patient education,  
6  
7 305 scheduling medical appointments, managing medications, and offering companionship during medical  
8  
9 306 visits. Their involvement improves health outcomes and fosters a sense of trust and comfort among  
10  
11 307 patients, significantly impacting their overall healthcare experience. However, most people do not fully  
12  
13 308 understand CHWs' role, even though some might already have been in contact with CHWs before.  
14  
15 309 Therefore, it is essential for people to know what CHWs can do for them to improve their healthcare  
16  
17 310 access.

19  
20  
21 311 **Subtheme: Assists and Guides the Patient**

22  
23  
24 312 Participants highlighted the vital role of CHWs in providing valuable assistance and guidance. CHWs  
25  
26 313 help patients understand their health conditions and learn how to manage their treatments, improving their  
27  
28 314 autonomy and care. One participant noted, "They guide you, give you information so you know what  
29  
30 315 these symptoms are based on, and how to take care of yourself" (FG103). Another shared, "They have  
31  
32 316 taught me how to inject insulin. I have done it, but I have had several doubts. And they clear up my  
33  
34 317 doubts" (IND39). These interactions enhance the interpersonal relationships between CHWs and patients,  
35  
36 318 fostering trust and confidence.

37  
38  
39  
40 319 **Subtheme: Helps Schedule Appointments with Specialists**

41  
42  
43 320 CHWs play a crucial role in helping patients schedule appointments with specialists, ensuring continuous  
44  
45 321 and specialized care, especially for chronic conditions. A participant explained, "If I needed such an  
46  
47 322 appointment with the specialist, find me one. When I need a referral, what I do is that I go with the  
48  
49 323 community health worker, we interconnect, and things seem to move a little faster; that's why it's  
50  
51 324 important" (IND2). This assistance is essential in maintaining the continuity of care and addressing the  
52  
53 325 specific health needs of patients.

1  
2  
3 **326 Subtheme: Assists in Medication Management**

4  
5  
6 **327** The support provided by CHWs in medication management is seen as crucial, particularly for those who  
7  
8 **328** struggle with maintaining their medication regimens. One participant stated simply, "They get the  
9  
10 **329** medicines for me" (IND59). This service is essential for ensuring that patients adhere to their prescribed  
11  
12 **330** treatments and manage their health conditions effectively.

13  
14  
15  
16 **331 Subtheme: Trust and Social/Health Support**

17  
18 **332** Participants valued the accompaniment provided by CHWs when accessing medical facilities. This  
19  
20 **333** support offers comfort and confidence, particularly when patients need to access laboratory services or  
21  
22 **334** return home. One participant shared, "And I have a lot of confidence in her when I have to go to the  
23  
24 **335** laboratory. She waits for me patiently. She takes me home" (IND59). This accompaniment helps reduce  
25  
26 **336** the stress and anxiety associated with medical appointments, contributing to better health outcomes.

27  
28  
29  
30 **337 Subtheme: Provides Comfort and Confidence**

31  
32  
33 **338** CHWs are recognized for their attentive and considerate care, which instills comfort and confidence in  
34  
35 **339** patients. As one participant expressed, "They gave me comfort" (IND49). This emotional support is  
36  
37 **340** essential to the healthcare experience, helping patients feel more secure and supported in managing their  
38  
39 **341** health.

40  
41  
42  
43 **342** By offering these services, CHWs play an integral role in improving healthcare delivery and outcomes,  
44  
45 **343** particularly in underserved communities. Their work addresses both the practical and emotional needs of  
46  
47 **344** patients, fostering a more supportive and effective healthcare environment.

48  
49  
50 **345 Theme 3 (T3): Telehealth Services**

51  
52  
53 **346** Participants expressed different perspectives towards the THS Services in providing healthcare access in  
54  
55 **347** rural and underserved communities for chronic disease management (Table 4). Some participants

1  
2  
3 348 believed that THS could offer numerous benefits, including reducing the need for transportation, saving  
4  
5 349 time and costs, and ensuring continuity of care when in-person medical visit options aren't available or  
6  
7 350 accessible. However, THS also faces challenges such as perceived inconvenience compared to in-person  
8  
9 351 visits, lack of knowledge among users, and concerns about data privacy. Despite these challenges, THS  
10  
11 352 was seen as a beneficial alternative when traditional healthcare options are inaccessible, enhancing overall  
12  
13 353 healthcare experiences by offering peace of mind and improved communication between patients and  
14  
15 354 providers.

16  
17  
18  
19 355 **Subtheme: Less Convenient than In-Person Care**

20  
21  
22 356 Participants identified concerns about the convenience of remote healthcare services compared to in-  
23  
24 357 person visits, especially highlighting the value of physical exams and the personal touch of face-to-face  
25  
26 358 consultations. One participant stated, "In-person visits are more convenient" (IND39). This underscores  
27  
28 359 the interpersonal challenge of remote healthcare services.

29  
30  
31 360 **Subtheme: Assistance During the Pandemic**

32  
33  
34 361 The crucial role of THS services during the pandemic was emphasized, providing necessary support and  
35  
36 362 care in challenging times, significantly when traditional services were disrupted. A participant noted, "It  
37  
38 363 was a great moment. And if you come to apply it in the case of Culebra, it would be phenomenal, too. I  
39  
40 364 would want to have a doctor all the time, but if I have no other option, well, it's great that this option is  
41  
42 365 there" (IND2). This highlights the community and societal benefits of THS during crises.

43  
44  
45  
46 366 **Subtheme: A Good Alternative When No Other Option is Available**

47  
48  
49 367 Participants viewed THS services as beneficial alternatives when in-person care is inaccessible, mainly  
50  
51 368 due to transportation issues. One participant shared, "I don't know about anyone else, but I do. I prefer a  
52  
53 369 doctor on camera than none at all" (IND39). This demonstrates the individual, community, and societal  
54  
55 370 advantages of having THS as an option.

1  
2  
3 **371 Subtheme: Lack of Knowledge**

4  
5  
6 **372** More knowledge about THS services and procedures still needs to be provided, which may prevent  
7  
8 **373** individuals from fully utilizing them. A participant admitted, "I haven't done it yet" (IND49). This reflects  
9  
10 **374** the individual-level challenge of awareness and education regarding THS.

11  
12  
13 **375 Subtheme: Independent of Transportation**

14  
15  
16 **376** The advantage of THS services not requiring transportation was particularly noted as useful for  
17  
18 **377** communities with limited access to transportation. One participant explained, "In bad weather that there is  
19  
20 **378** no transportation which cannot come, then that would be a good alternative" (IND39). This benefit spans  
21  
22 **379** community and societal levels.

23  
24  
25 **380 Subtheme: Time and Cost Savings**

26  
27  
28  
29 **381** Participants identified significant time and cost savings with the use of remote or THS services,  
30  
31 **382** eliminating the need for travel and reducing the opportunity cost of seeking medical care. One participant  
32  
33 **383** stated, "These trips would actually waste money and time" (FG103). Another noted, "It saves a lot of time  
34  
35 **384** because the kids don't have to miss school. It's a whole lost day" (IND1). These points highlight the  
36  
37 **385** individual and community benefits of THS.

38  
39  
40  
41 **386 Subtheme: Privacy Issues-Improper Disclosure of Personal Information**

42  
43  
44 **387** Concerns were raised about the potential for improper disclosure of personal information when using  
45  
46 **388** remote services, which may deter some from utilizing these services. A participant expressed, "There are  
47  
48 **389** also many people who do not like to give "[their]" data over the phone. There have been many hackers"  
49  
50 **390** (IND49). This concern affects individual, interpersonal, community, and societal levels.

51  
52  
53 **391 Subtheme: Rejection by Older or Technologically Challenged Individuals**



1  
2  
3 392 Participants identified that older individuals or those who are less technologically savvy may resist using  
4  
5 393 remote healthcare services due to unfamiliarity with technology or a preference for traditional in-person  
6  
7 394 care. One participant's opinion was, "Because sometimes there are many elderly people, they don't know  
8  
9 395 technology" (IND49). This reflects the individual and community challenges in THS adoption.

### 396 **Subtheme: Trust Depends on the Type of Medical Examination**

15  
16 397 Trust in the THS varies depending on the type of medical examination required. For visual assessments or  
17  
18 398 follow-ups, remote consultations may suffice, but for more tactile, in-depth examinations, in-person visits  
19  
20 399 are preferred to ensure safety and accuracy. One participant remarked, "The decision depends on whether  
21  
22 400 it is a follow-up consultation or if it is the first time with the specialist. If it is an evaluation or, if they  
23  
24 401 need to do a laboratory check, and if they are going to do a study later. Therefore, people should go in  
25  
26 402 person" (FG103). This indicates the individual-level trust considerations.

### 403 **Subtheme: Peace of Mind**

31  
32 404 Having healthcare consultations in the comfort of their own home provides patients with peace of mind. It  
33  
34 405 allows them to communicate more effectively, ensuring they remember to discuss all their concerns with  
35  
36 406 the doctor. A participant shared, "Yes, I sit in my room and explain everything to him. Sometimes, you go  
37  
38 407 to see the doctor, and you forget the things that you had to tell him" (IND59). This benefit is significant at  
39  
40 408 the individual level.

## 44 **DISCUSSION**

45  
46 410 Our findings suggest that the integration of THS with the support of CHWs was perceived positively by  
47  
48 411 the community as an effective approach to improve access to healthcare for those with chronic diseases  
49  
50 412 living in rural settings. Participants indicated that CHWs can positively impact some identified SDoH,  
51  
52 413 such as transportation challenges, particularly on the island, where a golf cart or a clinic official vehicle  
53  
54 414 was proposed to offer patients transportation to and from the clinic. However, it is essential to note that

1  
2  
3 415 some of these structural determinants include economic instability and geographical isolation, which are  
4  
5 416 beyond the scope of CHWs alone. This study found that the community perceived THS) along with the  
6  
7 417 support of CHWs, as a positive sign to improve access to healthcare. Moreover, participants' perspectives  
8  
9 418 confirmed that an intervention of CHWs-assisted THS can reduce the lack of specialized healthcare  
10  
11 419 access for patients living in rural settings.

12  
13  
14 420 The integration of CHWs and THS can help mitigate barriers related to transportation, provide timely  
15  
16 421 medical consultations, and offer continuous support for managing chronic conditions. The combination of  
17  
18 422 technology and personalized care from CHWs can foster trust and enhance patient engagement, leading to  
19  
20 423 better health outcomes.(26)

21  
22  
23  
24 424 The SEM served as a theoretical framework that helped us better understand the impact of interventions  
25  
26 425 using technology, such as THS, whether used alone or assisted by CHWs. SEM allowed for a  
27  
28 426 comprehensive analysis of how individual, interpersonal, community, and societal factors interact to  
29  
30 427 influence health outcomes. We were able to identify people's perspectives towards the potential  
31  
32 428 integration of CHWs and THS to solve the challenges of healthcare access. Results suggest that CHWs  
33  
34 429 can provide comfort and trust to patients, assist with patient education, schedule medical appointments,  
35  
36 430 manage medications, and offer companionship during medical visits. On the other hand, THS could solve  
37  
38 431 health access challenges, including the time-saving and cost-effectiveness of medical appointments,  
39  
40 432 transportation independence, and a more accessible tool for better chronic disease management. The  
41  
42 433 results confirm that this framework helps to better understand the perspectives and attitudes of people  
43  
44 434 toward integrating CHWs and the THS model for chronic disease management in rural areas.

45  
46  
47  
48 435 Findings from the present study confirm participants' challenges and perceptions toward CHW and THS.  
49  
50 436 We found that these two evidence-based models can be and should be implemented in rural and  
51  
52 437 underserved areas as part of an equitable model for healthcare. However, while CHWs and THS show  
53  
54 438 promise in addressing certain SDoH and improving healthcare access in rural areas, addressing the

1  
2  
3 439 broader structural determinants requires systemic changes and policy interventions. Future efforts should  
4  
5 440 enhance THS infrastructure, increase community health literacy and willingness, and support CHWs  
6  
7 441 (training) to ensure sustainable and equitable healthcare solutions for rural and isolated populations. By  
8  
9 442 leveraging the strengths of both CHWs and THS, we can move towards a more integrated and effective  
10  
11 443 approach to reducing health disparities and improving the overall health of communities like Culebra.  
12  
13  
14 444 From a health equity perspective, the findings also inform strategies to address similar issues in other  
15  
16 445 countries, particularly in rural island communities. These communities often face unique challenges such  
17  
18 446 as geographic isolation, limited healthcare resources, and higher vulnerability to health disparities.  
19  
20 447 Previous studies have shown that CHWs can help navigate health services for Latinx communities who  
21  
22 448 face challenges such as limited resources during COVID-19.(27) Studies have also demonstrated THS as  
23  
24 449 a powerful tool for routine provision of care for Latinos.(28) However, non-previous studies have  
25  
26 450 integrated both CHWs and THS to use them together. By adopting the evidence-based models of CHWs  
27  
28 451 and THS, rural island communities can improve healthcare access, enhance health education, and build  
29  
30 452 sustainable healthcare systems. This can lead to better health outcomes and reduced health disparities,  
31  
32 453 ultimately benefiting communities like Culebra and similar rural island populations globally.  
33  
34  
35

#### 36 454 **Study Limitations**

37  
38  
39 455 The qualitative findings are based on subjective self-reported data, which participants' personal biases  
40  
41 456 may influence. This study was limited by factors that could influence participant's perceptions and  
42  
43 457 experiences, including prior healthcare experiences, individual health literacy, and personal attitudes  
44  
45 458 toward technology and healthcare providers.  
46  
47  
48

#### 49 459 **Acknowledgments**

50  
51  
52 460 The study team would like to thank the HealthproMed Inc. Culebra clinic staff members for their support  
53  
54 461 during the implementation of the study. In addition, the study team acknowledges Mujeres de Islas Inc.  
55  
56  
57  
58  
59  
60

1  
2  
3 462 (Culebra community-based organization) for allowing the study team to recruit and promote our study  
4  
5 463 and the Puerto Rico Public Health Trust for CHWs capacity training.  
6  
7

8 464 **Funding**  
9

10  
11 465 This study was supported by the Robert Wood Johnson Foundation Health Equity Scholars for Action  
12  
13 466 Award (GR531931; Pérez-Ramos PI).  
14  
15

16 467  
17  
18

19 468  
20  
21

22 469  
23  
24

25 470  
26  
27

28 471  
29  
30

31 472  
32  
33

34 473  
35  
36

37 474  
38  
39

40 475  
41  
42

43 476  
44  
45

46 477  
47  
48

49 478  
50  
51

52 479  
53  
54

For Peer Review

## 480 REFERENCES

- 481 1. The United States Census Bureau. American Community Survey 2017 Population Estimates 2017  
482 [Available from: <https://www.census.gov/programs-surveys/acs>.
- 483 2. Laditka JN, Laditka SB, H PJ. Health care access in rural areas: evidence that hospitalization for  
484 ambulatory care-sensitive conditions in the United States may increase with the level of rurality. *Health &*  
485 *place*. 2009;15 (3):761-70.
- 486 3. Gong G PS, Hudson C, Curti D, et al. Higher US rural mortality rates linked to socioeconomic  
487 status, physician shortages, and lack of health insurance. *Health Affairs*. 2019;38(12):2003-10.
- 488 4. James W CJ. Long-term trends in Black and White mortality in the rural United States: Evidence  
489 of a race-specific rural mortality penalty. *The Journal of Rural Health*. 2017;33(1):21-31.
- 490 5. The Centers for Disease Control and Prevention, National Diabetes Statistics Report. (2022)
- 491 6. International Diabetes Federation. *Diabetes in Puerto Rico (2021)*.
- 492 7. Goodman R PS, Huang E, Prekh A, et al. *Defining and Measuring Chronic Conditions:*  
493 *Imperatives for Research. Policy, Program, and Practice*. 2013.
- 494 8. Josiemer Mattei MT, Carlos F. Ríos'Bedoya, Rui S. Xiao, et al. Health conditions and lifestyle  
495 risk factors of adults living in Puerto Rico: a cross-sectional study. *BMC Public Health*. 2018;19(491).
- 496 9. The United States Census Bureau. *Culebra Municipio, Puerto Rico Population Facts 2022*
- 497 10. HealthproMED Inc. *2024 Community Health Needs Assessment*.
- 498 11. Perez-Ramos JG, McIntosh S, Barrett ES, et al. Qualitative Assessment of Environmental Health  
499 Risk Perceptions and Community Challenges in a Puerto Rican Community: Change and Continuity in  
500 Response to Hurricanes Irma and Maria. *Behav Med*. 2019:1-14.
- 501 12. Varas-Díaz N, Rodríguez-Madera S, Padilla M, et al. On leaving: Coloniality and physician  
502 migration in Puerto Rico. *Soc Sci Med*. 2023;325:115888.
- 503 13. El Nuevo Dia. *Manifestantes llevan reclamos sobre lanchas para Vieques y Culebra a La*  
504 *Fortaleza y al Capitolio*. El Nuevo Dia. 2019.
- 505 14. Perez-Ramos JG, McIntosh S, Barrett ES, et al. Qualitative Assessment of Environmental Health  
506 Risk Perceptions and Community Challenges in a Puerto Rican Community: Change and Continuity in  
507 Response to Hurricanes Irma and Maria. *Behav Med*. 2020;46(3-4):231-44.
- 508 15. Perez-Ramos JG, McIntosh S, Barrett ES, et al. Attitudes Toward the Environment and Use of  
509 Information and Communication Technologies to Address Environmental Health Risks in Marginalized  
510 Communities: Prospective Cohort Study. *J Med Internet Res*. 2021;23(9):e24671.
- 511 16. Wosik J FM, Cameron B, et al. Telehealth transformation: COVID-19 and the rise of virtual care.  
512 *Journal of the American Medical Informatics Association*. 2020;27(6):957-62.
- 513 17. Chu C CP, Pang A, Stamenova V, et al. Rural Telemedicine Use Before and During the COVID-  
514 19 Pandemic: Repeated Cross-sectional Study. *Journal of medical Internet research*. 2021;23(4):e26960.
- 515 18. Kilanowski JF. Breadth of the Socio-Ecological Model. *Journal of Agromedicine*. 2017:295-7.
- 516 19. Tong A, Sainsbury P, Craig J. Consolidated criteria for reporting qualitative research (COREQ): a  
517 32-item checklist for interviews and focus groups. *Int J Qual Health Care*. 2007;19(6):349-57.
- 518 20. Malterud K, Siersma VD, Guassora AD. Sample Size in Qualitative Interview Studies: Guided by  
519 Information Power. *Qualitative Health Research*. 2015;26(13):1753-60.
- 520 21. Hanna Kallio A-MP, Martin Johnson, Mari Kangasniemi Docent. Systematic methodological  
521 review: developing a framework for a qualitative semi-structured interview guide. *Journal of Advanced*  
522 *Nursing*. 2016;72(12):2954-65.
- 523 22. Beebe J. *Rapid qualitative inquiry: A field guide to team-based assessment*: Rowman &  
524 Littlefield; 2014.
- 525 23. Glaser BG, Strauss AL. *The discovery of grounded theory: Strategies for qualitative research*:  
526 Routledge; 2017.
- 527 24. Brislin RW. Back-translation for cross-cultural research. *Journal of cross-cultural psychology*.  
528 1970;1(3):185-216.

1  
2  
3 529 25. Dedoose. 4.5, web application for managing, analyzing, and presenting qualitative and mixed  
4 530 method research data (2013). Los Angeles, CA: SocioCultural Research Consultants, LLC.  
5 531 26. Bhaumik S, Moola S, Tyagi J, et al. Community health workers for pandemic response: a rapid  
6 532 evidence synthesis. *BMJ Global Health*. 2020;5(6):e002769.  
7 533 27. Hernandez-Salinas C, Marsiglia FF, Oh H, et al. Community Health Workers as Puentes/Bridges  
8 534 to Increase COVID-19 Health Equity in Latinx Communities of the Southwest U.S. *J Community Health*.  
9 535 2023;48(3):398-413.  
10 536 28. Anaya YB, Hernandez GD, Hernandez SA, et al. Meeting them where they are on the web:  
11 537 addressing structural barriers for Latinos in telehealth care. *J Am Med Inform Assoc*. 2021;28(10):2301-  
12 538 5.

13  
14  
15 539  
16  
17  
18  
19  
20  
21  
22  
23  
24  
25  
26  
27  
28  
29  
30  
31  
32  
33  
34  
35  
36  
37  
38  
39  
40  
41  
42  
43  
44  
45  
46  
47  
48  
49  
50  
51  
52  
53  
54  
55  
56  
57  
58  
59  
60

For Peer Review

Figure 1- Applied Social Ecological Framework to the Thematic Analysis

Figure 1- Applied Social Ecological Framework to the Thematic Analysis

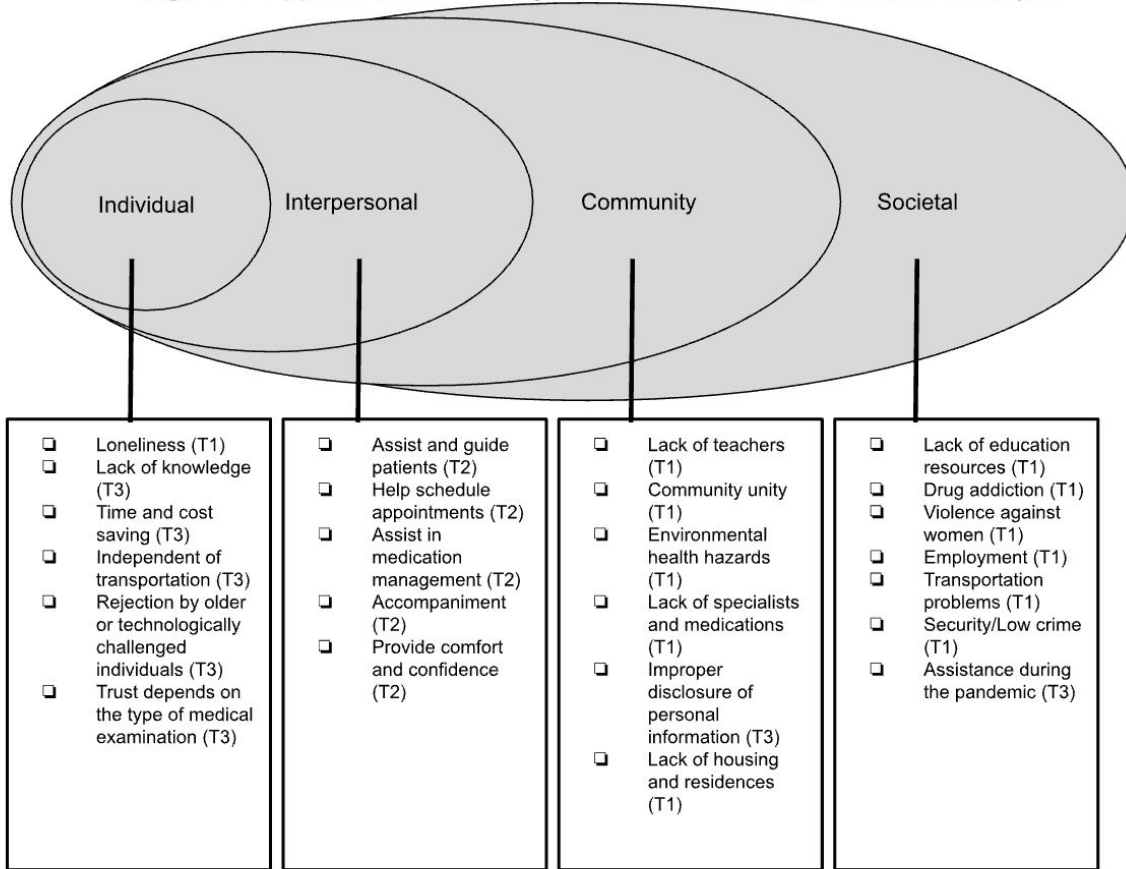

T1, T2, and T3 represents the main three themes from study findings

It is made available under a [CC-BY-NC-ND 4.0 International license](https://creativecommons.org/licenses/by-nc-nd/4.0/).

Table 1- Qualitative Research Logistic and Demographic Information

Table 1. Qualitative Research logistic and demographic informations

| Criteria           | Description                                                                                                                      |
|--------------------|----------------------------------------------------------------------------------------------------------------------------------|
| Gender             | Male = 8 (40%)<br>Women = 12 (60%)                                                                                               |
| Interviews Length  | 55 min 42 sec (AVERAGE)                                                                                                          |
| Age                | 20s: N=2 (10%)<br>30s: N=1 (5%)<br>40s: N=2 (10%)<br>50s: N=3 (15%)<br>60s: N=3 (15%)<br>70s: N=1 (5%)<br>Undisclosed: N=8 (40%) |
| Educational Levels | <HS: N=5 (25%)<br>=HS: N=9 (45%)<br>>HS: N=2 (10%)<br>Undisclosed: N=4 (20%)                                                     |



It is made available under a [CC-BY-NC-ND 4.0 International license](https://creativecommons.org/licenses/by-nc-nd/4.0/).

**Table 2: Theme 1 - Social Determinants of Health**

| Domains          | Individual                                                                                                                                                                                           | Interpersonal | Community                                                                                                                                                                                               | Societal                                                                                                                                                                                                                                                                                                         |
|------------------|------------------------------------------------------------------------------------------------------------------------------------------------------------------------------------------------------|---------------|---------------------------------------------------------------------------------------------------------------------------------------------------------------------------------------------------------|------------------------------------------------------------------------------------------------------------------------------------------------------------------------------------------------------------------------------------------------------------------------------------------------------------------|
| <b>Subthemes</b> | <ul style="list-style-type: none"> <li>• Lack of education resources</li> <li>• Loneliness</li> <li>• Employment</li> <li>• Lack of housing and residences</li> <li>• Lack of medications</li> </ul> | Employment    | <ul style="list-style-type: none"> <li>• Lack of education resources</li> <li>• Employment</li> <li>• Community unity</li> <li>• Environmental health hazards</li> <li>• Lack of medications</li> </ul> | <ul style="list-style-type: none"> <li>• Lack of education resources</li> <li>• Employment</li> <li>• Lack of housing and residences</li> <li>• Transportation problems</li> <li>• Safety/Low crime</li> <li>• Community unity</li> <li>• Environmental health hazards</li> <li>• Lack of medications</li> </ul> |

For Peer Review

It is made available under a [CC-BY-NC-ND 4.0 International license](https://creativecommons.org/licenses/by-nc-nd/4.0/).

**Table 3: Theme 2 – The role of Community Health Workers**

| Domains          | Individual                                                                                                                                                                          | Interpersonal                                                                                                                                                                                                                                                         | Community                                                                         | Societal                                                                          |
|------------------|-------------------------------------------------------------------------------------------------------------------------------------------------------------------------------------|-----------------------------------------------------------------------------------------------------------------------------------------------------------------------------------------------------------------------------------------------------------------------|-----------------------------------------------------------------------------------|-----------------------------------------------------------------------------------|
| <b>Subthemes</b> | <ul style="list-style-type: none"><li>• Helps schedule appointments with specialists</li><li>• Assists in medication management</li><li>• Provides comfort and confidence</li></ul> | <ul style="list-style-type: none"><li>• Assist and guides the patient</li><li>• Helps schedule appointments with specialists</li><li>• Assists in medication management</li><li>• Trust and social/health support</li><li>• Provides comfort and confidence</li></ul> | <ul style="list-style-type: none"><li>• Provides comfort and confidence</li></ul> | <ul style="list-style-type: none"><li>• Provides comfort and confidence</li></ul> |

For Peer Review

**Table 4: Theme 3 – Telehealth Services**

| Domains                 | Individual                                                                                                                                                                                                                                                                                                                                                                                         | Interpersonal                                                                                                                                           | Community                                                                                                                                                                                                                                                                                                                                                           | Societal                                                                                                                                                                                                                                                    |
|-------------------------|----------------------------------------------------------------------------------------------------------------------------------------------------------------------------------------------------------------------------------------------------------------------------------------------------------------------------------------------------------------------------------------------------|---------------------------------------------------------------------------------------------------------------------------------------------------------|---------------------------------------------------------------------------------------------------------------------------------------------------------------------------------------------------------------------------------------------------------------------------------------------------------------------------------------------------------------------|-------------------------------------------------------------------------------------------------------------------------------------------------------------------------------------------------------------------------------------------------------------|
| <p><b>Subthemes</b></p> | <ul style="list-style-type: none"> <li>• A good alternative when no other option is available</li> <li>• Lack of knowledge</li> <li>• Time and cost saving</li> <li>• Possible improper disclosure of personal information</li> <li>• Rejection by older or technologically challenged individuals</li> <li>• Trust depends on the type of medical examination</li> <li>• Peace of Mind</li> </ul> | <ul style="list-style-type: none"> <li>• Less convenient than in-person care</li> <li>• Possible improper disclosure of personal information</li> </ul> | <ul style="list-style-type: none"> <li>• Assistance during the pandemic</li> <li>• A good alternative when no other option is available</li> <li>• Independent of transportation</li> <li>• Time and cost saving</li> <li>• Possible improper disclosure of personal information</li> <li>• Rejection by older or technologically challenged individuals</li> </ul> | <ul style="list-style-type: none"> <li>• Assistance during the pandemic</li> <li>• A good alternative when no other option is available</li> <li>• Independent of transportation</li> <li>• Possible improper disclosure of personal information</li> </ul> |
